# Supplementary material for: Self-assembly of micelles with pH/ROS dual-responsiveness and mitochondrial targeting for potential anti-tumor applications
Source: Royal Society of Chemistry journal article supplement (doi:10.1039/d2nj03244a), 2022-01-01
Supplement: d2nj03244a1.pdf [file d2nj03244a1.pdf]

## **Self-assembly micelles with pH/ROS dual responsive and mitochondrial targeting for potential anti-tumor**

Huan Xu<sup>1</sup>, Mingyue Yang<sup>1</sup>, Yijing Du<sup>1</sup>, Tian Gao<sup>1</sup>, Yi Liu<sup>1,3</sup>, Liwei Xiong<sup>2,\*</sup>, Na Peng<sup>1,\*</sup>

<sup>1</sup> *Key Laboratory of Coal Conversion and New Carbon Materials of Hubei Province & Institute of Advanced Materials and Nanotechnology, School of Chemistry and Chemical Engineering, Wuhan University of Science and Technology, Wuhan, Hubei 430081, China*

<sup>2</sup> *Hubei Key Laboratory of Plasma Chemistry and Advanced Materials, Key Laboratory of Novel Biomass-Based Environmental and Energy Materials in Petroleum and Chemical Industry, Wuhan Institute of Technology, Wuhan 430205, China*

<sup>3</sup> *State Key Laboratory of Separation Membranes and Membrane Process, School of Chemistry, Tiangong University, Tianjin 300378, China*

\* Corresponding authors:

E-mail addresses: [pengna@wust.edu.cn](mailto:pengna@wust.edu.cn) (N. Peng)

[zhily2000@126.com](mailto:zhily2000@126.com) (L.W. Xiong)

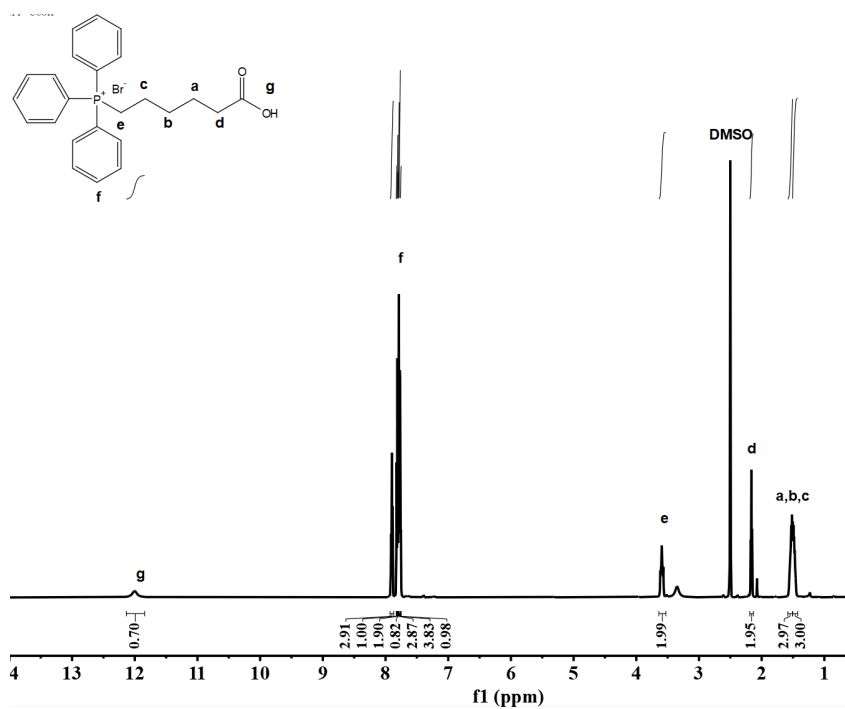

Fig. S1 <sup>1</sup>H NMR spectrum of TPP-COOH.
